# Supplementary material for: Deuterium incorporation in biomass cell wall components by NMR analysis
Source: Royal Society of Chemistry journal article supplement (doi:10.1039/c2an16025k), 2012-01-01
Supplement: c2an16025k.pdf [file c2an16025k.pdf]

Cite this: DOI: 10.1039/c0xx00000x

www.rsc.org/xxxxxx

## Supplementary Material

### Supplementary Experimental

#### Solid State NMR Analysis

Solid NMR samples were prepared with dry ball-milled biomass added into 4-mm cylindrical ceramic MAS rotors. Solid-state NMR measurements were carried out on a Bruker Avance-400 spectrometer operating at frequencies of 61.4 ( $^2\text{H}$ ) or 400.1 ( $^1\text{H}$ ) MHz in a Bruker double-resonance MAS probehead under non-spinning conditions.  $^2\text{H}$  NMR spectra were collected using a 1D 90-90 solid-echo sequence for deuterium wide-line observation accounting for the detector dead time delay, with an on-resonance 2.5  $\mu\text{s}$  excitation pulse, echo delay of 20  $\mu\text{s}$ , 8k data points, 0.5  $\mu\text{s}$  dwell time, 15-s recycle time, and 4k scans.  $^1\text{H}$  NMR spectra were measured with an on-resonance 2.5  $\mu\text{s}$  excitation pulse, 4k data points, 0.5  $\mu\text{s}$  dwell time, 15-s recycle delay and 512 scans. To ensure the quantitative nature of the spectra, average spin-lattice times of glucose/glucose- $\text{d}_7$  mixture in the solid form ( $^1\text{H}$  4.4 s and  $^2\text{H}$  1.2 s), D-kale in the solid form ( $^1\text{H}$  2.1 s and  $^2\text{H}$  1.0 s) and D-kale dissolved in ionic liquid ( $^1\text{H}$  0.8 s and  $^2\text{H}$  0.02 s) were measured using a saturation recovery experiment which in turn utilized a train of 64 pulses separated by 500  $\mu\text{s}$  to fully excite all nuclei present. We chose a saturation recovery experiment because of the difficulty in finding exact 90 and 180 degree pulses in these highly heterogeneous systems. The average  $^2\text{H}$  relaxation during echo formation was measured on the glucose/glucose- $\text{d}_7$  (20  $\mu\text{s}$ ) mixture and D-kale (126  $\mu\text{s}$ ) using a 2D 90-90 solid-echo sequence with variable delay times during the 90 degree pulses.  $^1\text{H}$  spectra were baseline corrected and processed using 5 Hz exponential apodization, while  $^2\text{H}$  spectra were saved as analog filtered data, baseline corrected and processed using 1 kHz exponential apodization.

#### Supplementary Figures

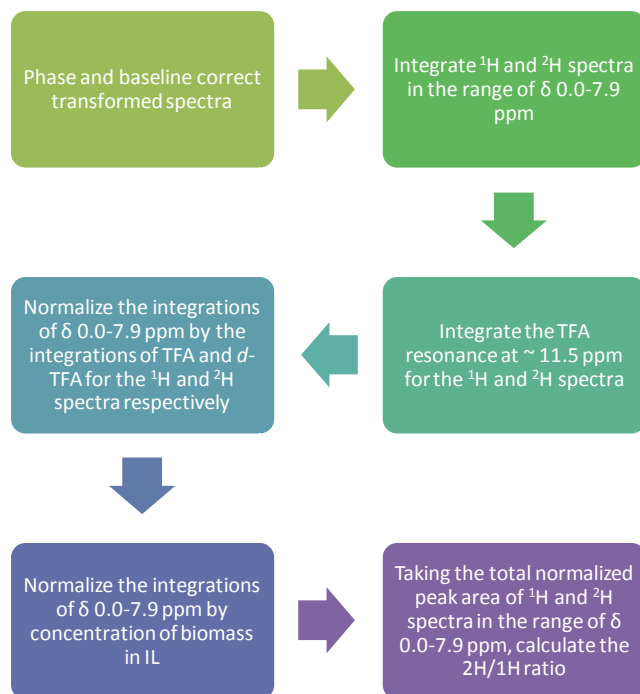

**Supplementary Fig. 1.** Flowchart describing the procedure for calculating the  $^1\text{H}$  and  $^2\text{H}$  solution spectra of D-labeled biomass by whole cell ionic liquid dissolution.

Cite this: DOI: 10.1039/c0xx00000x

www.rsc.org/xxxxxx

## Supplementary Material

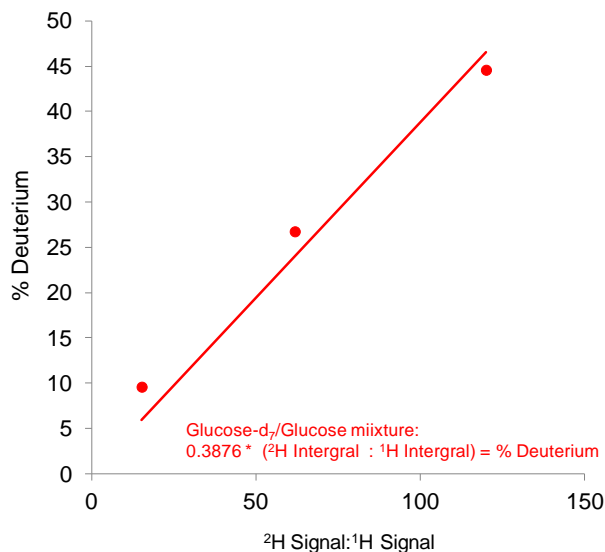

**Supplementary Fig. 2.** Calibration curve relating the % deuterium determined by the molar fraction of glucose/glucose-d<sub>7</sub> mixtures to the integral of the proton and deuterium spectra in a 4-mm MAS rotor.

### Supplementary Discussion

For example, keeping in mind for every one TFA proton there is one TFA deuteron in the external standard, therefore the <sup>1</sup>H spectra indicated for every TFA proton there was 1.25 proton on the D-Kale sample in the deuterated solvent system likewise the <sup>2</sup>H spectra indicated for every TFA deuteron there was 1.69 deuteron on the D-Kale sample in the protonated solvent system. By mass, the concentration of the D-Kale in the <sup>1</sup>H spectra was .035 g of D-Kale in 1 g of deuterated solvent system and .045 g of D-Kale in 1 g of protonated solvent system for the <sup>2</sup>H spectra. After normalizing by the concentration of D-Kale in solution and the TFA/*d*-TFA ratio, the ratio of deuterons to protons in D-Kale is 17.8:35.7 or 33.2%.
